# Supplementary material for: Revealing the crystal facet effect on N2O formation during the NH3-SCR over α-MnO2 catalysts
Source: Royal Society of Chemistry journal article supplement (doi:10.1039/d2ra06744g), 2023-01-01
Supplement: d2ra06744g2.pdf [file d2ra06744g2.pdf]

Supplementary Information for

**Revealing the crystal facet effect on N<sub>2</sub>O formation during the NH<sub>3</sub>-  
SCR over  $\alpha$ -MnO<sub>2</sub> catalysts**

*Jundong Guo, <sup>a</sup> Fengli Gan, <sup>a</sup> Yifan Zhao, <sup>a</sup> Jinglin He, <sup>a</sup> Tao Gao, <sup>d</sup> Xia Jiang, <sup>a, b, c</sup>  
Shenggui Ma, <sup>a, b, c\*</sup>*

<sup>a</sup> College of Architecture and Environment, Sichuan University, Chengdu 610065, China.

<sup>b</sup> College of Carbon Neutrality Future Technology, Sichuan University, Chengdu 610065, China.

<sup>c</sup> National Engineering Research Center for Flue Gas Desulfurization, Sichuan University, Chengdu 610065, China.

<sup>d</sup> Institute of Atomic and Molecular Physics, Sichuan University, Chengdu 610065, China.

\*Corresponding author: Shenggui Ma. E-mail: masgui@scu.edu.cn.

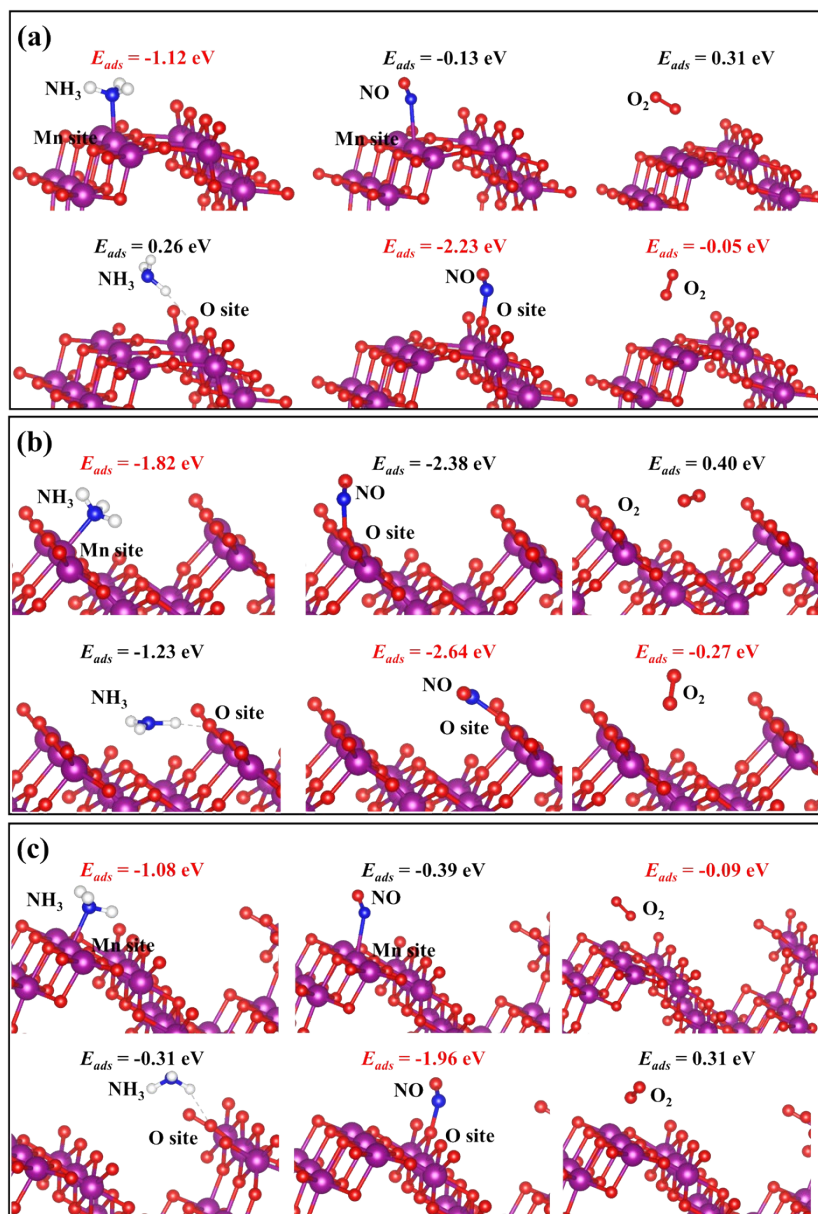

**Fig. S1** Adsorption configurations of NH<sub>3</sub>, NO and O<sub>2</sub> molecules on (a)  $\alpha$ -MnO<sub>2</sub> (100); (b)  $\alpha$ -MnO<sub>2</sub> (110); (c)  $\alpha$ -MnO<sub>2</sub> (310). Purple, red, dark blue and white circles denote Mn, O, N and H atoms respectively.

**Table S1** Reaction rate constant ( $k$ ) of each elementary reaction on  $\alpha$ -MnO<sub>2</sub> under different temperatures.

| Facets | Reaction rate constants ( $k$ , s <sup>-1</sup> ) | Temperature (K)       |                       |                       |                       |                       |
|--------|---------------------------------------------------|-----------------------|-----------------------|-----------------------|-----------------------|-----------------------|
|        |                                                   | 350                   | 375                   | 400                   | 425                   | 450                   |
| (100)  | $k$ (R1)                                          | $2.79 \times 10^{-7}$ | $7.37 \times 10^{-6}$ | $1.33 \times 10^{-4}$ | $1.75 \times 10^{-3}$ | $1.76 \times 10^{-2}$ |
|        | $k$ (R2)                                          | $4.56 \times 10^4$    | $1.73 \times 10^5$    | $5.59 \times 10^5$    | $1.57 \times 10^6$    | $3.95 \times 10^6$    |
|        | $k$ (R3)                                          | $2.09 \times 10^{11}$ | $2.47 \times 10^{11}$ | $2.87 \times 10^{11}$ | $3.28 \times 10^{11}$ | $3.69 \times 10^{11}$ |
| (110)  | $k$ (R1)                                          | $3.59 \times 10^1$    | $1.75 \times 10^2$    | $7.05 \times 10^2$    | $2.41 \times 10^3$    | $7.19 \times 10^3$    |
|        | $k$ (R2)                                          | $1.18 \times 10^{-2}$ | $9.09 \times 10^{-2}$ | $5.36 \times 10^{-1}$ | 2.54                  | 10.03                 |
|        | $k$ (R3)                                          | $3.59 \times 10^1$    | $1.82 \times 10^2$    | $7.57 \times 10^2$    | $2.66 \times 10^3$    | $8.13 \times 10^3$    |
| (310)  | $k$ (R1)                                          | $2.47 \times 10^9$    | $3.72 \times 10^9$    | $5.33 \times 10^9$    | $7.32 \times 10^9$    | $9.71 \times 10^9$    |
|        | $k$ (R2)                                          | $2.15 \times 10^{-1}$ | 1.65                  | 9.89                  | 48.05                 | $1.96 \times 10^2$    |
|        | $k$ (R3)                                          | $1.55 \times 10^{-4}$ | $2.09 \times 10^{-3}$ | $2.06 \times 10^{-2}$ | $2.16 \times 10^{-1}$ | $9.41 \times 10^{-1}$ |
